# Supplementary material for: A Hybrid System of Braden Scale and Machine Learning to Predict Hospital-Acquired Pressure Injuries (Bedsores): A Retrospective Observational Cohort Study
Source: MDPI journal article supplement (doi:10.3390/diagnostics13010031), 2022-12-22
Supplement: s1 [file s1]

**Supplementary Table S1.** Patient characteristics

|                             |                                                   |                                 | Pressure Injuries                |         |                            |            | P value |
|-----------------------------|---------------------------------------------------|---------------------------------|----------------------------------|---------|----------------------------|------------|---------|
|                             |                                                   |                                 | Non-HAPI patients<br>(N =15,404) |         | HAPI patients<br>(N = 485) |            |         |
|                             | Risk Factors                                      | Sub-factors<br>(if categorical) | N or<br>mean                     | % or SD | N or mean                  | % or<br>SD |         |
| Demographics                | Sex                                               | Female                          | 7233                             | 46.96   | 195                        | 40.21      | <0.01   |
|                             |                                                   | Male                            | 8171                             | 53.04   | 290                        | 59.79      |         |
|                             | Race                                              | White                           | 10045                            | 65.21   | 310                        | 63.92      | 0.73    |
|                             |                                                   | Black                           | 4359                             | 28.30   | 148                        | 30.52      |         |
|                             |                                                   | Multiracial                     | 127                              | 0.82    | 4                          | 0.82       |         |
|                             |                                                   | Other                           | 856                              | 5.56    | 23                         | 4.74       |         |
|                             |                                                   | Declined                        | 17                               | 0.11    | 0                          | 0.00       |         |
|                             | Ethnic Group                                      | Not Hispanic or Latino          | 14637                            | 95.02   | 457                        | 94.23      | 0.53    |
|                             |                                                   | Hispanic or Latino              | 752                              | 4.88    | 28                         | 5.77       |         |
|                             |                                                   | Declined                        | 15                               | 0.10    | 0                          | 0.00       |         |
|                             | Age                                               | N/A                             | 66.5                             | 16.40   | 68.9                       | 14.1       | <0.01   |
| Medical                     | American Society of Anesthesiologists (ASA) Score | Low                             | 13086                            | 84.95   | 333                        | 68.66      | <0.01   |
|                             |                                                   | Mid                             | 742                              | 4.82    | 59                         | 12.16      |         |
|                             |                                                   | High                            | 1576                             | 10.23   | 93                         | 19.18      |         |
|                             | Emergency Department Length-of-Stay               | N/A                             | 10.15                            | 7.63    | 10.09                      | 7.86       | 0.36    |
|                             | ICU During Encounter                              | Yes                             | 4274                             | 27.75   | 269                        | 55.46      | <0.01   |
|                             |                                                   | No                              | 11130                            | 72.25   | 216                        | 44.54      |         |
|                             | Number of Surgeries                               | N/A                             | 0.30                             | 0.62    | 0.80                       | 1.33       | <0.01   |
|                             | Palliative Orders                                 | Yes                             | 1888                             | 12.26   | 186                        | 38.35      | <0.01   |
|                             |                                                   | No                              | 13516                            | 87.74   | 299                        | 61.65      |         |
|                             | Prior Year Inpatient Visit                        | N/A                             | 1.12                             | 1.96    | 0.95                       | 1.53       | 0.02    |
|                             | Steroid History                                   | Yes                             | 5050                             | 32.78   | 148                        | 30.52      | 0.29    |
|                             |                                                   | No                              | 10354                            | 67.22   | 337                        | 69.48      |         |
|                             | Transitional During Encounter                     | Yes                             | 2541                             | 16.50   | 170                        | 35.05      | <0.01   |
|                             |                                                   | No                              | 12863                            | 83.50   | 315                        | 64.95      |         |
| Number of Pressure Injuries | N/A                                               | 0.20                            | 1.20                             | 0.50    | 1.96                       | <0.01      |         |
| Diagnosis                   | Comorbidity                                       | N/A                             | 7.36                             | 4.55    | 7.83                       | 4.46       | 0.02    |
|                             | Depression                                        | Yes                             | 4988                             | 32.38   | 135                        | 27.84      | 0.04    |
|                             |                                                   | No                              | 10416                            | 67.62   | 350                        | 72.16      |         |
|                             | Diabetes                                          | Yes                             | 7441                             | 48.31   | 258                        | 53.20      | 0.03    |
|                             |                                                   | No                              | 7963                             | 51.69   | 227                        | 46.80      |         |
|                             | Renal Failure                                     | Yes                             | 7502                             | 48.70   | 315                        | 64.95      | <0.01   |
|                             |                                                   | No                              | 7902                             | 51.30   | 170                        | 35.05      |         |

|             |                                   |     |        |       |        |       |       |
|-------------|-----------------------------------|-----|--------|-------|--------|-------|-------|
|             | Sepsis Diagnosis                  | Yes | 1404   | 9.11  | 118    | 24.33 | <0.01 |
|             |                                   | No  | 14000  | 90.89 | 367    | 75.67 |       |
|             | Stroke History                    | Yes | 2123   | 13.78 | 114    | 23.51 | <0.01 |
|             |                                   | No  | 13281  | 86.22 | 371    | 76.49 |       |
|             | Pressure Injury upon Admission    | Yes | 947    | 6.15  | 68     | 14.02 | <0.01 |
|             |                                   | No  | 14457  | 93.85 | 417    | 85.98 |       |
| Labs        | Albumin (First)                   | N/A | 3.53   | 0.58  | 3.26   | 0.65  | <0.01 |
|             | Albumin (Most Recent)             | N/A | 3.35   | 0.57  | 2.90   | 0.58  | <0.01 |
|             | Albumin (Average)                 | N/A | 3.40   | 0.54  | 2.94   | 0.52  | <0.01 |
|             | Blood Urea Nitrogen (BUN) (First) | N/A | 28.50  | 23.40 | 33.90  | 26.30 | <0.01 |
|             | BUN (Most Recent)                 | N/A | 26.80  | 22.30 | 30.90  | 25.20 | <0.01 |
|             | BUN (Average)                     | N/A | 27.80  | 19.40 | 33.50  | 19.10 | <0.01 |
|             | C-reactive Protein (First)        | N/A | 25.90  | 66.80 | 44.90  | 86.10 | <0.01 |
|             | C-reactive Protein (Most Recent)  | N/A | 13.90  | 47.60 | 24.50  | 58.30 | <0.01 |
|             | C-reactive Protein (Average)      | N/A | 20.10  | 52.50 | 33.60  | 63.90 | <0.01 |
|             | Creatine Serum (First)            | N/A | 1.68   | 2.00  | 2.12   | 2.57  | <0.01 |
|             | Creatine Serum (Most Recent)      | N/A | 1.43   | 1.56  | 1.50   | 1.65  | 0.356 |
|             | Creatine Serum (Average)          | N/A | 1.51   | 1.62  | 1.69   | 1.73  | 0.022 |
|             | Hemoglobin (First)                | N/A | 11.91  | 2.61  | 11.72  | 2.59  | 0.107 |
|             | Hemoglobin (Most Recent)          | N/A | 10.90  | 2.79  | 9.88   | 2.02  | <0.01 |
|             | Hemoglobin (Average)              | N/A | 11.09  | 2.21  | 10.13  | 1.85  | <0.01 |
|             | Lactate (First)                   | N/A | 1.31   | 1.87  | 1.82   | 2.30  | <0.01 |
|             | Lactate (Most Recent)             | N/A | 1.14   | 1.63  | 1.55   | 2.07  | <0.01 |
|             | Lactate (Average)                 | N/A | 1.22   | 1.56  | 1.68   | 1.87  | <0.01 |
|             | Sodium (First)                    | N/A | 136.89 | 5.51  | 136.37 | 6.67  | 0.094 |
|             | Sodium (Most Recent)              | N/A | 138.80 | 4.06  | 138.78 | 4.73  | 0.938 |
|             | Sodium (Average)                  | N/A | 138.58 | 3.98  | 139.01 | 4.48  | 0.037 |
| Medications | High Mean Arterial Pressure (MAP) | Yes | 2877   | 18.68 | 178    | 36.70 | <0.01 |
|             |                                   | No  | 12527  | 81.32 | 307    | 63.30 |       |
|             | Opioids                           | Yes | 8791   | 57.07 | 384    | 79.18 | <0.01 |
|             |                                   | No  | 6613   | 42.93 | 101    | 20.82 |       |
|             | Steroid Use                       | Yes | 8050   | 52.26 | 354    | 72.99 | <0.01 |
|             |                                   | No  | 7354   | 47.74 | 131    | 27.01 |       |
|             | Stimuli Anesthesia                | Yes | 2170   | 14.09 | 148    | 30.52 | <0.01 |
|             |                                   | No  | 13234  | 85.91 | 337    | 69.48 |       |
|             | Stimuli Paralytics                | Yes | 842    | 5.47  | 76     | 15.67 | <0.01 |
|             |                                   | No  | 14562  | 94.53 | 409    | 84.33 |       |
|             | Stimuli Sedation                  | Yes | 2870   | 18.63 | 201    | 41.44 | <0.01 |

|                 |                                              |       |       |          |         |          |       |
|-----------------|----------------------------------------------|-------|-------|----------|---------|----------|-------|
| Medical Devices |                                              | No    | 12534 | 81.37    | 284     | 58.56    | <0.01 |
|                 | Stimuli Tracheostomy                         | Yes   | 488   | 3.17     | 80      | 16.49    |       |
|                 |                                              |       | No    | 14916    | 96.83   | 405      |       |
|                 | Vasopressor                                  | Yes   | 4306  | 27.95    | 287     | 59.18    | <0.01 |
|                 |                                              | No    | 11098 | 72.05    | 198     | 40.82    |       |
|                 | Artificial Air Management                    | Yes   | 2842  | 18.45    | 201     | 41.44    | <0.01 |
|                 |                                              | No    | 12562 | 81.55    | 284     | 58.56    |       |
|                 | Face Mask                                    | Yes   | 4579  | 29.73    | 283     | 58.35    | <0.01 |
|                 |                                              | No    | 10825 | 70.27    | 202     | 41.65    |       |
|                 | Nasal Cannula                                | Yes   | 10398 | 67.50    | 393     | 81.03    | <0.01 |
|                 |                                              | No    | 5006  | 32.50    | 92      | 18.97    |       |
|                 | Noninvasive Ventilation                      | Yes   | 41    | 0.27     | 0       | 0.00     | 0.26  |
|                 |                                              | No    | 15363 | 99.73    | 485     | 100.00   |       |
|                 | Pharyngeal                                   | Yes   | 9     | 0.06     | 2       | 0.41     | <0.01 |
|                 |                                              | No    | 15395 | 99.94    | 483     | 99.59    |       |
|                 | Room Air                                     | Yes   | 14374 | 93.31    | 459.000 | 94.64    | 0.25  |
|                 |                                              | No    | 1030  | 6.69     | 26      | 5.36     |       |
|                 | Ventilator                                   | Yes   | 2830  | 18.37    | 199.00  | 41.03    | <0.01 |
|                 |                                              | No    | 12574 | 81.63    | 286     | 58.97    |       |
|                 | Feeding Tube                                 | Yes   | 1735  | 11.26    | 207.00  | 42.68    | <0.01 |
| No              |                                              | 13669 | 88.74 | 278      | 57.32   |          |       |
| Assessments     | Blood Pressure Systolic (First)              | N/A   | 135   | 29.20    | 128     | 30.20    | <0.01 |
|                 | Blood Pressure Systolic (Most Recent)        | N/A   | 125   | 22.20    | 120     | 23.00    | <0.01 |
|                 | Blood Pressure Systolic (Average)            | N/A   | 127   | 16.40    | 122     | 14.70    | <0.01 |
|                 | Blood Pressure Diastolic (First)             | N/A   | 78    | 17.60    | 74      | 18.20    | <0.01 |
|                 | Blood Pressure Diastolic (Most Recent)       | N/A   | 72    | 12.50    | 68      | 13.60    | <0.01 |
|                 | Blood Pressure Dias-tolic (Average)          | N/A   | 73    | 8.78     | 69      | 7.80     | <0.01 |
|                 | Body Mass Index (BMI)                        | N/A   | 29    | 25.00    | 26      | 8.46     | <0.01 |
|                 | Count of Glasgow Coma Score (GCS)            |       |       |          |         |          |       |
|                 | Comment of Intubated or Chemically Paralyzed | N/A   | 899   | 1,126.00 | 2968    | 3,182.00 | <0.01 |
|                 | Glasgow Coma Score (GCS) (First)             | N/A   | 14    | 1.73     | 13      | 2.39     | <0.01 |
|                 | Glasgow Coma Score (GCS) (Most Recent)       | N/A   | 3     | 0.57     | 3       | 0.58     | <0.01 |
|                 | Glasgow Coma Score (GCS) (Average)           | N/A   | 14    | 1.73     | 13      | 2.39     | <0.01 |

|                                                            |                    |       |       |     |        |       |
|------------------------------------------------------------|--------------------|-------|-------|-----|--------|-------|
| Patient Refusal to Change Position                         | Yes                | 4466  | 28.99 | 272 | 56.08  | <0.01 |
|                                                            | No                 | 10938 | 71.01 | 213 | 43.92  |       |
| Pulse Oximetry (First)                                     | N/A                | 95.86 | 5.08  | 96  | 5.09   | 0.80  |
| Pulse Oximetry (Most Recent)                               | N/A                | 94.96 | 6.58  | 94  | 90.08  | 0.12  |
| Pulse Oximetry (Average)                                   | N/A                | 96.02 | 2.13  | 96  | 1.89   | <0.01 |
| Skin Abnormality on Admission                              | Yes                | 15384 | 99.87 | 485 | 100.00 | 0.43  |
|                                                            | No                 | 20    | 0.13  | 0   | 0.00   |       |
| Body Temperature (First)                                   | N/A                | 37    | 0.81  | 37  | 1.51   | <0.01 |
| Body Temperature (Most Recent)                             | N/A                | 37    | 0.55  | 37  | 1.42   | <0.01 |
| Body Temperature (Average)                                 | N/A                | 37    | 0.26  | 37  | 0.25   | <0.01 |
| Weight Loss                                                | Yes                | 729   | 0.05  | 34  | 0.07   | 0.02  |
|                                                            | No                 | 14675 | 0.95  | 451 | 0.93   |       |
| Overall Braden Score (First)                               | Risky (<18)        | 6393  | 41.50 | 307 | 63.30  | <0.01 |
|                                                            | Non-Risky (≥18)    | 9011  | 58.50 | 178 | 36.70  |       |
| Overall Braden Score (Most Recent)                         | Risky (<18)        | 5693  | 36.96 | 359 | 74.02  | <0.01 |
|                                                            | Non-Risky (≥18)    | 9711  | 63.04 | 126 | 25.98  |       |
| Overall Braden Score (Average)                             | Risky (<18)        | 11325 | 73.52 | 479 | 98.76  | <0.01 |
|                                                            | Non-Risky (≥18)    | 4079  | 26.48 | 6   | 1.24   |       |
| Sensory Perception Status (First)                          | Completely Limited | 577   | 3.75  | 56  | 11.55  | <0.01 |
|                                                            | Very Limited       | 1031  | 6.69  | 39  | 8.04   |       |
|                                                            | Slightly Limited   | 3343  | 21.70 | 129 | 26.60  |       |
|                                                            | No Impairment      | 10453 | 67.86 | 261 | 53.81  |       |
| Sensory Perception Status (Most Recent)                    | Completely Limited | 633   | 4.11  | 53  | 10.93  | <0.01 |
|                                                            | Very Limited       | 814   | 5.28  | 79  | 16.29  |       |
|                                                            | Slightly Limited   | 3313  | 21.51 | 136 | 28.04  |       |
|                                                            | No Impairment      | 1044  | 6.78  | 217 | 44.74  |       |
| Sensory Perception Status (Average)                        | Completely Limited | 392   | 2.54  | 34  | 7.01   | <0.01 |
|                                                            | Very Limited       | 1488  | 9.66  | 144 | 29.69  |       |
|                                                            | Slightly Limited   | 8768  | 56.92 | 277 | 57.11  |       |
|                                                            | No Impairment      | 4756  | 30.88 | 30  | 6.19   |       |
| Skin Moisture/ Circulation/ Excretion Status (First)       | Constantly Moist   | 124   | 0.80  | 7   | 1.44   | <0.01 |
|                                                            | Often Moist        | 1051  | 6.82  | 47  | 9.69   |       |
|                                                            | Often Moist        | 4466  | 28.99 | 201 | 41.44  |       |
|                                                            | Rarely Moist       | 9763  | 63.38 | 230 | 47.42  |       |
| Skin Moisture/ Circulation/ Excretion Status (Most Recent) | Constantly Moist   | 78    | 0.51  | 8   | 1.65   | <0.01 |
|                                                            | Often Moist        | 757   | 4.91  | 61  | 12.58  |       |
|                                                            | Often Moist        | 4051  | 26.30 | 234 | 48.25  |       |

|  |                                                              |                          |       |       |      |       |       |
|--|--------------------------------------------------------------|--------------------------|-------|-------|------|-------|-------|
|  |                                                              | Rarely Moist             | 10518 | 68.28 | 182  | 37.53 |       |
|  | Skin Moisture/<br>Circulation/ Excretion<br>Status (Average) | Constantly Moist         | 12    | 0.08  | 0.00 | 0.00  | <0.01 |
|  |                                                              | Often Moist              | 1893  | 12.29 | 139  | 28.66 |       |
|  |                                                              | Often Moist              | 8097  | 52.56 | 323  | 66.60 |       |
|  |                                                              | Rarely Moist             | 5402  | 35.07 | 23   | 4.74  |       |
|  |                                                              |                          |       |       |      |       |       |
|  | Activity Status (First)                                      | Bedfast                  | 3429  | 22.26 | 172  | 35.46 | <0.01 |
|  |                                                              | Chairfast                | 1877  | 12.19 | 87   | 17.94 |       |
|  |                                                              | Walks<br>Occasionally    | 6840  | 44.40 | 174  | 35.88 |       |
|  |                                                              | Walks Frequently         | 3258  | 21.15 | 52   | 10.72 |       |
|  |                                                              |                          |       |       |      |       |       |
|  | Activity Status (Most<br>Recent)                             | Bedfast                  | 2362  | 15.33 | 182  | 37.53 | <0.01 |
|  |                                                              | Chairfast                | 2418  | 15.70 | 146  | 30.10 |       |
|  |                                                              | Walks Occasion-<br>ally  | 7619  | 49.46 | 137  | 28.25 |       |
|  |                                                              | Walks Frequently         | 3005  | 19.51 | 20   | 4.12  |       |
|  |                                                              |                          |       |       |      |       |       |
|  | Activity Status<br>(Average)                                 | Bedfast                  | 3690  | 23.95 | 276  | 56.91 | <0.01 |
|  |                                                              | Chairfast                | 5384  | 34.95 | 179  | 36.91 |       |
|  |                                                              | Walks Occasion-<br>ally  | 6145  | 39.89 | 30   | 6.19  |       |
|  |                                                              | Walks Frequently         | 185   | 1.20  | 0.00 | 0.00  |       |
|  |                                                              |                          |       |       |      |       |       |
|  | Mobility Status (First)                                      | Completely<br>Immobile   | 692   | 4.49  | 49   | 10.10 | <0.01 |
|  |                                                              | Very Limited             | 2392  | 15.53 | 125  | 25.77 |       |
|  |                                                              | Slightly Limited         | 6142  | 39.87 | 195  | 40.21 |       |
|  |                                                              | No Limitations           | 6178  | 40.11 | 116  | 23.92 |       |
|  |                                                              |                          |       |       |      |       |       |
|  | Mobility Status (Most<br>Recent)                             | Completely<br>Immobile   | 819   | 5.32  | 66   | 13.61 | <0.01 |
|  |                                                              | Very Limited             | 1857  | 12.06 | 131  | 27.01 |       |
|  |                                                              | Slightly Limited         | 6353  | 41.24 | 220  | 45.36 |       |
|  |                                                              | No Limitations           | 6375  | 41.39 | 68   | 14.02 |       |
|  |                                                              |                          |       |       |      |       |       |
|  | Mobility Status<br>(Average)                                 | Completely<br>Immobile   | 770   | 5.00  | 72   | 14.85 | <0.01 |
|  |                                                              | Very Limited             | 4199  | 27.26 | 290  | 59.79 |       |
|  |                                                              | Slightly Limited         | 8744  | 56.76 | 121  | 24.95 |       |
|  |                                                              | No Limitations           | 1691  | 10.98 | 2    | 0.41  |       |
|  |                                                              |                          |       |       |      |       |       |
|  | Nutrition Status (First)                                     | Very Poor                | 596   | 3.87  | 36   | 7.42  | <0.01 |
|  |                                                              | Probably<br>Inadequate   | 2293  | 14.89 | 112  | 23.09 |       |
|  |                                                              | Adequate                 | 9477  | 61.52 | 269  | 55.46 |       |
|  |                                                              | Excellent                | 3038  | 19.72 | 68   | 14.02 |       |
|  |                                                              |                          |       |       |      |       |       |
|  | Nutrition Status (Most<br>Recent)                            | Very Poor                | 579   | 3.76  | 29   | 5.98  | <0.01 |
|  |                                                              | Probably Inade-<br>quate | 1345  | 8.73  | 84   | 17.32 |       |
|  |                                                              | Adequate                 | 11084 | 71.96 | 326  | 67.22 |       |
|  |                                                              | Excellent                | 2396  | 15.55 | 46   | 9.48  |       |
|  |                                                              |                          |       |       |      |       |       |

|  |                                                |                            |      |       |      |       |                 |
|--|------------------------------------------------|----------------------------|------|-------|------|-------|-----------------|
|  | <b>Nutrition Status (Average)</b>              | <b>Very Poor</b>           | 350  | 2.27  | 17   | 3.51  | <b>&lt;0.01</b> |
|  |                                                | <b>Probably Inadequate</b> | 6084 | 39.50 | 349  | 71.96 |                 |
|  |                                                | <b>Adequate</b>            | 8927 | 57.95 | 119  | 24.54 |                 |
|  |                                                | <b>Excellent</b>           | 43   | 0.28  | 0.00 | 0.00  |                 |
|  | <b>Friction and Shear Status (First)</b>       | <b>Problem</b>             | 821  | 5.33  | 47   | 9.69  | <b>&lt;0.01</b> |
|  |                                                | <b>Potential Problem</b>   | 4745 | 30.80 | 210  | 43.30 |                 |
|  |                                                | <b>No Apparent Problem</b> | 9838 | 63.87 | 228  | 47.01 |                 |
|  | <b>Friction and Shear Status (Most Recent)</b> | <b>Problem</b>             | 1085 | 7.04  | 163  | 33.61 | <b>&lt;0.01</b> |
|  |                                                | <b>Potential Problem</b>   | 4767 | 30.95 | 203  | 41.86 |                 |
|  |                                                | <b>No Apparent Problem</b> | 9552 | 62.01 | 119  | 24.54 |                 |
|  | <b>Friction and Shear Status (Average)</b>     | <b>Problem</b>             | 2100 | 13.63 | 224  | 46.19 | <b>&lt;0.01</b> |
|  |                                                | <b>Potential Problem</b>   | 8973 | 58.25 | 257  | 52.99 |                 |
|  |                                                | <b>No Apparent Problem</b> | 4331 | 28.12 | 4    | 0.82  |                 |

SD: Standard deviation, Gray color: Risk Factor selected by machine learning, Bold P value: statistically significant ( $< 0.05$ ), N/A: Continuous factors; no sub-categories (t-test, otherwise it is categorical: Chi-square test), First: risk factors/diagnosis upon admission, Last: Most recent diagnosis before discharge, Average: the average of all observed values during visit.
